# Supplementary material for: Bacterial Pulmonary Co-Infections on ICU Admission: Comparison in Patients with SARS-CoV-2 and Influenza Acute Respiratory Failure: A Multicentre Cohort Study
Source: MDPI journal article supplement (doi:10.3390/biomedicines10102646), 2022-10-20
Supplement: s1 [file s1]

Table S1: Results of studies comparing co-infections in patients with influenza or SARS-CoV2 pneumonia or comparing the two diseases.

|           | Authors, year                    | Type of study                      | % co-infections                   | Pathogens                                                                                                                                                     | Risk factors                                        | Added mortality risk                                                                                        |
|-----------|----------------------------------|------------------------------------|-----------------------------------|---------------------------------------------------------------------------------------------------------------------------------------------------------------|-----------------------------------------------------|-------------------------------------------------------------------------------------------------------------|
| Influenza | (MacIntyre et al. 2018)          | Review                             | 19–47%                            | <i>S. pneumoniae</i> (54% hospit, 24% ICU),<br><i>A. baumannii</i> (5-21%),<br>MRSA (3-6%),<br><i>K. pneumoniae</i> (1-8%)                                    |                                                     |                                                                                                             |
|           | (Mercat et al. 2011)             | Review                             | 30% in ICU                        | <i>S. pneumoniae</i> (46%),<br><i>S. aureus</i> (20%)                                                                                                         | None found                                          | 22% vs. 20%. Especially if co-inf with GNB and if cormorbity                                                |
|           | (Rice et al. 2012)               | Retrospective, US, multicentric    | 154/683 (22.5%)                   | <i>S. aureus</i> (37%)<br><i>S. pneumoniae</i> (12%)                                                                                                          |                                                     | <i>S aureus</i> (relative risk 2.82; 95% confidence interval 1.76-4.51; $p < 0.01$ )                        |
| SARS-CoV2 | (Westblade, Simon & Satlin 2021) | Review                             | 4%                                | <i>S. aureus</i> (31%),<br><i>S. pneumoniae</i> (23%), <i>H. influenzae</i> (11%)                                                                             | Age, chronic kidney and heart diseases and diabetes | ↗ duration of hospitalisation (7 days vs. 5 $p = 0.003$ ) and hospital mortality (48% vs. 18% $p < 0.001$ ) |
|           | (Baskaran et al. 2021)           | Observational, UK, multicentric    | 5.5%                              | <i>S. aureus</i> (31%),<br><i>S. pneumoniae</i> (23%)                                                                                                         |                                                     |                                                                                                             |
|           | (Garcia-Vidal et al. 2021)       | Retrospective cohort, Barcelona    | 7.2% and 3.1% early co-infections | <i>S. pneumoniae</i> (12 cases), <i>S. aureus</i> (12), <i>Pseudomonas aeruginosa</i> (10), <i>Escherichia coli</i> (7), and <i>Klebsiella pneumoniae</i> (6) | Diabetes, chronic kidney and heart diseases         | No added mortality for early co-infections                                                                  |
|           | (Musuuza et al. 2021)            | Meta-analysis                      | 18% in ICU                        | <i>K. pneumoniae</i> (9.9%), <i>S. pneumoniae</i> (8.2%), and <i>S. aureus</i> (7.7%).                                                                        |                                                     | Added risk of mortality if co-infection (OR = 2.84; 95% CI: 1.42–5.66)                                      |
|           | (Rawson et al. 2020)             | Review                             | 8%                                | No data                                                                                                                                                       | No data                                             | No data                                                                                                     |
|           | (Contou et al. 2020)             | Retrospective, France, monocentric | 19/92(20%)                        | <i>S. aureus</i> (31.6%), <i>H. Influenzae</i> (31.6%), <i>S Pneumoniae</i> (26%), <i>Enterobacter spp.</i> (26%)                                             | No data                                             | No data                                                                                                     |
|           | (De Santis et al. 2022)          | Retrospective, Italy, multicentric | 35/245 (14.3%)                    | <i>S. aureus</i> (48.5%), <i>H Influenzae</i> (20%)                                                                                                           | No data                                             | No data                                                                                                     |

|                         |                        |                                                     |                                                  |                                                                                                                                                                                                                                                                                                      |            |                                                                                                                                                                                                                 |
|-------------------------|------------------------|-----------------------------------------------------|--------------------------------------------------|------------------------------------------------------------------------------------------------------------------------------------------------------------------------------------------------------------------------------------------------------------------------------------------------------|------------|-----------------------------------------------------------------------------------------------------------------------------------------------------------------------------------------------------------------|
|                         | (Elabbadi et al. 2021) | Retrospective, France, monocentric                  | 20/101(19.8%)                                    | <i>S. aureus</i> (55%)<br>Enterobacter spp. (40%)                                                                                                                                                                                                                                                    | No data    | No data                                                                                                                                                                                                         |
|                         | (Russel et al. 2021)   | Retrospective, UK, multicentric, Hospital admission | 318/48 902                                       | <i>S. aureus</i> (17.8%), <i>H. influenzae</i> (12.7%) and <i>P. aeruginosa</i> (9.3%) were most frequently identified in positive sputum samples, <i>S. aureus</i> in positive deep respiratory samples (31.1%), and <i>E. coli</i> (26.7%) and <i>S. aureus</i> (13.3%) in positive blood cultures | No data    | found no association in patients admitted to critical care who were identified to have a respiratory or bloodstream infection and subsequent mortality (unadjusted odds ratio 1.02, 95% CI 0.86–1.22; p = 0.81) |
|                         | Santos et al. 2022     | Meta-analysis                                       | 1394 co-infected patients.                       | Enterobacter spp. (35%), <i>S. aureus</i> (27%), <i>Klebsiella</i> spp. (21%)                                                                                                                                                                                                                        |            |                                                                                                                                                                                                                 |
| Influenza and SARS-CoV2 | (Rouze et al. 2021)    | Retrospective, France, multicentric                 | 9.7% (SARS-CoV2) vs. 33.6% (Influenza)           | GPCs responsible for 58% and 72% of co-infections and GNBs for 41.8% and 27.8% in patients with SARS-CoV2 and with influenza, respectively.                                                                                                                                                          | None found | No difference in impact on mortality                                                                                                                                                                            |
|                         | (Hedberg et al. 2022)  | Retrospective, monocentric                          | 4% (SARS-CoV2) vs. 27% (Influenza)               | No difference, <i>S. pneumoniae</i> and <i>S. aureus</i>                                                                                                                                                                                                                                             | None found | No difference in mortality                                                                                                                                                                                      |
|                         | (Pandey et al. 2022)   | Retrospective, multicentric retrospective cohort    | 8.7% (SARS-CoV2) vs. 25% (Influenza)             | <i>S. aureus</i> foremost in 2 groups                                                                                                                                                                                                                                                                | None found | No data                                                                                                                                                                                                         |
|                         | (Sarton et al. 2022)   | Retrospective, France, monocentric                  | 11/65 (16) (SARS-CoV2) vs 20/60 (33) (Influenza) | Influenza: <i>S. aureus</i> (40%), <i>S. pneumoniae</i> (22%); COVID-19: <i>S. aureus</i> (25%), <i>H. influenzae</i> (25%), non fermenting gram-negative bacilli (41%), Enterobacteriaceae (8%)                                                                                                     | No data    | No data                                                                                                                                                                                                         |

Table S2: Comparison of living and deceased patients in influenza and/or SARS-CoV2 pneumonia at D60.

|                                                 | All        |            |      |               |          | Influenza |           |      |               |          | SARS-CoV2  |            |      |               |          |
|-------------------------------------------------|------------|------------|------|---------------|----------|-----------|-----------|------|---------------|----------|------------|------------|------|---------------|----------|
|                                                 | Living     | Deceased   | HR   | 95% CI        | <i>p</i> | Living    | Deceased  | HR   | 95% CI        | <i>p</i> | Living     | Deceased   | HR   | 95% CI        | <i>p</i> |
| <b>Number of patients</b>                       | 965        | 384        | .    |               |          | 129       | 28        | .    |               |          | 836        | 356        | .    |               |          |
| <b>Time from admission to ICU &gt; 2 days</b>   | 369 (38.2) | 157 (40.9) | 1.09 | [0.89 ; 1.34] | 0.40     | 28 (21.7) | 10 (35.7) | 1.59 | [0.73 ; 3.46] | 0.24     | 341 (40.8) | 147 (41.3) | 1.00 | [0.81 ; 1.24] | 1.00     |
| <b>Age &gt; 60 years</b>                        | 506 (52.4) | 317 (82.6) | 3.21 | [2.46 ; 4.18] | <0.01    | 62 (48.1) | 17 (60.7) | 1.64 | [0.76 ; 3.54] | 0.20     | 444 (53.1) | 300 (84.3) | 3.34 | [2.5 ; 4.45]  | <0.01    |
| <b>Sex (male)</b>                               | 690 (71.5) | 267 (69.5) | 0.86 | [0.7 ; 1.08]  | 0.19     | 78 (60.5) | 15 (53.6) | 0.67 | [0.32 ; 1.42] | 0.30     | 612 (73.2) | 252 (70.8) | 0.83 | [0.66 ; 1.05] | 0.11     |
| <b>BMI &gt; 30 kg/m<sup>2</sup></b>             | 368 (38.1) | 140 (36.5) | 0.93 | [0.76 ; 1.15] | 0.51     | 34 (26.4) | 11 (39.3) | 1.47 | [0.69 ; 3.16] | 0.32     | 334 (40)   | 129 (36.2) | 0.86 | [0.7 ; 1.07]  | 0.19     |
| <b>Chronic cardiovascular disease</b>           | 193 (20)   | 135 (35.2) | 1.89 | [1.53 ; 2.34] | <0.01    | 18 (14)   | 4 (14.3)  | 1.40 | [0.47 ; 4.16] | 0.55     | 175 (20.9) | 131 (36.8) | 1.78 | [1.43 ; 2.21] | <0.01    |
| <b>Chronic lung disease</b>                     | 121 (12.5) | 61 (15.9)  | 1.08 | [0.82 ; 1.42] | 0.59     | 42 (32.6) | 7 (25)    | 0.65 | [0.28 ; 1.54] | 0.33     | 79 (9.4)   | 54 (15.2)  | 1.36 | [1.02 ; 1.83] | 0.04     |
| <b>Chronic kidney disease</b>                   | 67 (6.9)   | 59 (15.4)  | 1.93 | [1.45 ; 2.55] | <0.01    | 14 (10.9) | 4 (14.3)  | 1.42 | [0.49 ; 4.09] | 0.52     | 53 (6.3)   | 55 (15.4)  | 2.00 | [1.49 ; 2.68] | <0.01    |
| <b>Immunosuppression</b>                        | 132 (13.7) | 73 (19)    | 1.21 | [0.94 ; 1.57] | 0.15     | 42 (32.6) | 17 (60.7) | 2.69 | [1.25 ; 5.81] | 0.01     | 90 (10.8)  | 56 (15.7)  | 1.26 | [0.95 ; 1.68] | 0.11     |
| <b>Chronic liverc disease</b>                   | 18 (1.9)   | 15 (3.9)   | 1.68 | [1 ; 2.82]    | 0.05     | 5 (3.9)   | 2 (7.1)   | 1.29 | [0.3 ; 5.45]  | 0.73     | 13 (1.6)   | 13 (3.7)   | 1.97 | [1.13 ; 3.43] | 0.02     |
| <b>Diabetes</b>                                 | 142 (14.7) | 68 (17.7)  | 1.18 | [0.91 ; 1.53] | 0.22     | 20 (15.5) | 6 (21.4)  | 1.24 | [0.5 ; 3.1]   | 0.64     | 122 (14.6) | 62 (17.4)  | 1.17 | [0.89 ; 1.55] | 0.25     |
| <b>SAPS &gt; 40</b>                             | 233 (24.1) | 207 (53.9) | 2.39 | [1.95 ; 2.92] | <0.01    | 54 (41.9) | 22 (78.6) | 3.88 | [1.56 ; 9.63] | <0.01    | 179 (21.4) | 185 (52)   | 2.43 | [1.97 ; 2.99] | <0.01    |
| <b>SOFA &gt; 8</b>                              | 86 (8.9)   | 100 (26)   | 2.47 | [1.96 ; 3.13] | <0.01    | 19 (14.7) | 11 (39.3) | 2.73 | [1.26 ; 5.9]  | 0.01     | 67 (8)     | 89 (25)    | 2.56 | [2 ; 3.28]    | <0.01    |
| <b>PaO<sub>2</sub>/FiO<sub>2</sub> &lt; 150</b> | 617 (63.9) | 291 (75.8) | 1.46 | [1.16 ; 1.85] | <0.01    | 71 (55)   | 17 (60.7) | 1.26 | [0.59 ; 2.71] | 0.55     | 546 (65.3) | 274 (77)   | 1.42 | [1.11 ; 1.82] | 0.01     |
| <b>Invasive mechanical ventilation</b>          | 262 (27.2) | 162 (42.3) | 1.39 | [1.13 ; 1.72] | <0.01    | 62 (48.1) | 17 (60.7) | 1.17 | [0.54 ; 2.53] | 0.69     | 200 (23.9) | 145 (40.8) | 1.64 | [1.31 ; 2.04] | <0.01    |
| <b>Vasopressors</b>                             | 144 (14.9) | 105 (27.3) | 1.76 | [1.38 ; 2.25] | <0.01    | 12 (9.3)  | 6 (21.4)  | 2.11 | [0.84 ; 5.25] | 0.11     | 132 (15.8) | 99 (27.8)  | 1.64 | [1.27 ; 2.12] | <0.01    |
| <b>Renal replacement therapy</b>                | 22 (2.3)   | 32 (8.3)   | 2.64 | [1.83 ; 3.8]  | <0.01    | 7 (5.4)   | 2 (7.1)   | 1.41 | [0.33 ; 5.99] | 0.64     | 15 (1.8)   | 30 (8.4)   | 2.94 | [2.02 ; 4.29] | <0.01    |
| <b>Corticoids</b>                               | 513 (53.2) | 229 (59.6) | 1.18 | [0.95 ; 1.46] | 0.13     | 35 (27.1) | 4 (14.3)  | 0.39 | [0.14 ; 1.14] | 0.09     | 478 (57.2) | 225 (63.2) | 1.14 | [0.91 ; 1.43] | 0.26     |
| <b>Antibiotics at admission</b>                 | 539 (55.9) | 246 (64.1) | 1.21 | [0.98 ; 1.51] | 0.08     | 67 (51.9) | 14 (50)   | 1.19 | [0.56 ; 2.52] | 0.65     | 472 (56.5) | 232 (65.2) | 1.19 | [0.95 ; 1.49] | 0.13     |
| <b>Beta-lactamase inhibitor</b>                 | 106 (11)   | 62 (16.1)  | 1.50 | [1.14 ; 1.98] | <0.01    | 32 (24.8) | 11 (39.3) | 1.84 | [0.86 ; 3.95] | 0.12     | 74 (8.9)   | 51 (14.3)  | 1.82 | [1.34 ; 2.48] | <0.01    |

|                                  |            |            |      |               |       |           |          |      |                |       |            |            |      |               |       |
|----------------------------------|------------|------------|------|---------------|-------|-----------|----------|------|----------------|-------|------------|------------|------|---------------|-------|
| <b>Cephalosporin</b>             | 412 (42.7) | 182 (47.4) | 1.02 | [0.83 ; 1.26] | 0.82  | 40 (31)   | 9 (32.1) | 1.26 | [0.57 ; 2.8]   | 0.57  | 372 (44.5) | 173 (48.6) | 0.96 | [0.77 ; 1.18] | 0.68  |
| <b>Macrolides</b>                | 271 (28.1) | 109 (28.5) | 0.97 | [0.77 ; 1.22] | 0.81  | 34 (26.4) | 9 (32.1) | 1.75 | [0.78 ; 3.94]  | 0.17  | 237 (28.3) | 100 (28.2) | 0.94 | [0.74 ; 1.19] | 0.59  |
| <b>Aminosides</b>                | 30 (3.1)   | 37 (9.6)   | 2.30 | [1.64 ; 3.24] | <0.01 | 7 (5.4)   | 6 (21.4) | 4.42 | [1.74 ; 11.22] | <0.01 | 23 (2.8)   | 31 (8.7)   | 2.12 | [1.46 ; 3.08] | <0.01 |
| <b>Fluoroquinolone</b>           | 48 (5)     | 19 (5)     | 0.94 | [0.59 ; 1.5]  | 0.79  | 13 (10.1) | 0 (0)    |      |                |       | 35 (4.2)   | 19 (5.4)   | 1.18 | [0.73 ; 1.91] | 0.49  |
| <b>Anti MSSA</b>                 | 7 (0.7)    | 2 (0.5)    | 0.60 | [0.15 ; 2.39] | 0.47  | 3 (2.3)   | 0 (0)    |      |                |       | 4 (0.5)    | 2 (0.6)    | 0.70 | [0.18 ; 2.83] | 0.62  |
| <b>Anti MRSA</b>                 | 20 (2.1)   | 14 (3.7)   | 1.54 | [0.9 ; 2.64]  | 0.11  | 6 (4.7)   | 3 (10.7) | 2.93 | [0.87 ; 9.82]  | 0.08  | 14 (1.7)   | 11 (3.1)   | 1.41 | [0.77 ; 2.59] | 0.26  |
| <b>MDR colonisation</b>          | 43 (4.5)   | 26 (6.8)   | 1.21 | [0.81 ; 1.82] | 0.35  | 6 (4.7)   | 2 (7.1)  | 1.22 | [0.29 ; 5.16]  | 0.79  | 37 (4.4)   | 24 (6.8)   | 1.29 | [0.84 ; 1.96] | 0.24  |
| <b>Bacteraemia</b>               | 29 (3)     | 19 (5)     | 1.47 | [0.92 ; 2.34] | 0.10  | 4 (3.1)   | 2 (7.1)  | 4.54 | [1.04 ; 19.77] | 0.04  | 25 (3)     | 17 (4.8)   | 1.35 | [0.83 ; 2.2]  | 0.23  |
| <b>Co-infection at admission</b> | 97 (10.1)  | 40 (10.4)  | 0.89 | [0.64 ; 1.24] | 0.49  | 34 (26.4) | 5 (17.9) | 0.68 | [0.26 ; 1.79]  | 0.44  | 63 (7.5)   | 35 (9.8)   | 1.14 | [0.8 ; 1.62]  | 0.46  |

HR represents hazard Ratio for death at day 60.

BMI: Body Mass Index; SOFA: Sequential organ failure assessment, SAPS: simplified acute physiology score; MSSA: methicillin-susceptible *Staphylococcus aureus*, MRSA: methicillin-resistant *Staphylococcus aureus*; MDR: multi drug resistant

*Table S3: Impact of Co-infection on the risk of mortality at D60, multivariate Cox model – global and per-viruses analyses according to patients' subgroups.*

|                          |                               |      | All*          |          |      | Influenza**    |          |      | SARS-CoV2***  |          |
|--------------------------|-------------------------------|------|---------------|----------|------|----------------|----------|------|---------------|----------|
|                          | Variables                     | HR   | HR 95% CI     | <i>p</i> | HR   | HR 95% CI      | <i>p</i> | HR   | HR 95% CI     | <i>p</i> |
| All                      | Co-infection at admission     | 0.83 | [0.59 ; 1.15] | 0.26     | 0.67 | [0.25 ; 1.81]  | 0.43     | 0.97 | [0.68 ; 1.39] | 0.88     |
| All                      | GPC co-infection at admission | 0.69 | [0.41 ; 1.17] | 0.20     | 1.37 | [0.4 ; 4.72]   | 0.35     | 0.71 | [0.4 ; 1.27]  | 0.29     |
|                          | GNB co-infection at admission | 1.10 | [0.72 ; 1.70] | 0.67     | 1.26 | [0.29; 5.52]   | 0.74     | 1.17 | [0.74; 1.84]  | 0.52     |
|                          | No co-infection at admission  | 1    |               | 0.40     | 1    |                | 0.86     | 1    |               | 0.45     |
| Immunodepressed patients | Co-infection at admission     | 0.90 | [0.41 ; 2.01] | 0.81     | 0.79 | [0.18 ; 3.47]  | 0.75     | 1.03 | [0.38 ; 2.79] | 0.96     |
| Corticoids at admission  | Co-infection at admission     | 1.08 | [0.72 ; 1.63] | 0.70     | 2.16 | [0.22 ; 21.43] | 0.51     | 1.11 | [0.73 ; 1.68] | 0.64     |

HR represents hazard Ratio for death at day 60.

\*Adjustment for age, chronic cardiovascular diseases, immunodepression, PaO<sub>2</sub>/FiO<sub>2</sub> < 150, vasopressors, extrarenal purification and beta-lactamase inhibitors.

\*\* Adjustment for age and chronic cardiovascular diseases.

\*\*\* Adjustment for age, chronic cardiovascular diseases, invasive mechanical ventilation, extrarenal purification and beta-lactamase inhibitors.

GNB: gram negative bacteria; GPC: gram positive cocci.

Table S4: Risk factors for VAP, univariate analysis, Fine-Gray subdistribution hazard model.

|                                              | All        |            |      |               |          | Influenza |           |      |               |          | SARS-CoV2  |            |      |               |          |
|----------------------------------------------|------------|------------|------|---------------|----------|-----------|-----------|------|---------------|----------|------------|------------|------|---------------|----------|
|                                              | No VAP     | VAP        | HR   | HRCI          | <i>p</i> | No VAP    | VAP       | HR   | HRCI          | <i>p</i> | No VAP     | VAP        | HR   | HRCI          | <i>p</i> |
| Number of patients                           | 374        | 232        |      |               |          | 61        | 23        |      |               |          | 313        | 209        |      |               |          |
| SARS-CoV2 pneumonia                          | 313 (83.7) | 209 (90.1) | 1.13 | [0.71; 1.82]  | 0.61     |           |           |      |               |          |            |            |      |               |          |
| Time from hospital admission to ICU > 2 days | 130 (34.8) | 83 (35.8)  | 1.01 | [0.78 ; 1.32] | 0.92     | 14 (23)   | 6 (26.1)  | 1.34 | [0.54 ; 3.33] | 0.52     | 116 (37.1) | 77 (36.8)  | 0.99 | [0.75 ; 1.3]  | 0.92     |
| Age > 60 years                               | 235 (62.8) | 137 (59.1) | 0.91 | [0.7 ; 1.17]  | 0.45     | 28 (45.9) | 10 (43.5) | 1.02 | [0.46 ; 2.24] | 0.96     | 207 (66.1) | 127 (60.8) | 0.89 | [0.68 ; 1.17] | 0.41     |
| Sex (male)                                   | 257 (68.7) | 173 (74.6) | 1.16 | [0.86 ; 1.56] | 0.33     | 35 (57.4) | 12 (52.2) | 0.87 | [0.39 ; 1.93] | 0.73     | 222 (70.9) | 161 (77)   | 1.21 | [0.88 ; 1.67] | 0.24     |
| BMI > 30 kg/m <sup>2</sup>                   | 130 (34.8) | 100 (43.1) | 1.28 | [0.98 ; 1.66] | 0.07     | 17 (27.9) | 6 (26.1)  | 0.77 | [0.28 ; 2.11] | 0.61     | 113 (36.1) | 94 (45)    | 1.33 | [1.01 ; 1.74] | 0.04     |
| Chronic cardiovascular disease               | 103 (27.5) | 49 (21.1)  | 0.74 | [0.53 ; 1.03] | 0.08     | 6 (9.8)   | 2 (8.7)   | 1.19 | [0.26 ; 5.45] | 0.83     | 97 (31)    | 47 (22.5)  | 0.72 | [0.51 ; 1.01] | 0.06     |
| Chronic lung disease                         | 53 (14.2)  | 28 (12.1)  | 0.89 | [0.6 ; 1.32]  | 0.56     | 19 (31.1) | 8 (34.8)  | 1.57 | [0.65 ; 3.79] | 0.32     | 34 (10.9)  | 20 (9.6)   | 0.84 | [0.53 ; 1.33] | 0.46     |
| Chronic kidney disease                       | 40 (10.7)  | 14 (6)     | 0.59 | [0.35 ; 1.01] | 0.05     | 5 (8.2)   | 0 (0)     |      |               |          | 35 (11.2)  | 14 (6.7)   | 0.62 | [0.36 ; 1.06] | 0.08     |
| Immunosuppression                            | 68 (18.2)  | 16 (6.9)   | 0.45 | [0.27 ; 0.76] | <0.01    | 23 (37.7) | 4 (17.4)  | 0.48 | [0.16 ; 1.45] | 0.19     | 45 (14.4)  | 12 (5.7)   | 0.45 | [0.25 ; 0.83] | 0.01     |
| Chronic liver disease                        | 11 (2.9)   | 5 (2.2)    | 0.84 | [0.32 ; 2.15] | 0.71     | 2 (3.3)   | 3 (13)    | 2.83 | [0.9 ; 8.91]  | 0.07     | 9 (2.9)    | 2 (1)      | 0.39 | [0.09 ; 1.67] | 0.21     |
| Diabetes                                     | 62 (16.6)  | 42 (18.1)  | 1.12 | [0.8 ; 1.58]  | 0.51     | 9 (14.8)  | 5 (21.7)  | 1.93 | [0.7 ; 5.34]  | 0.20     | 53 (16.9)  | 37 (17.7)  | 1.08 | [0.75 ; 1.56] | 0.68     |
| SAPS > 40                                    | 187 (50)   | 100 (43.1) | 0.84 | [0.65 ; 1.08] | 0.18     | 43 (70.5) | 12 (52.2) | 0.65 | [0.3 ; 1.44]  | 0.29     | 144 (46)   | 88 (42.1)  | 0.88 | [0.67 ; 1.15] | 0.34     |
| SOFA > 8                                     | 96 (25.7)  | 54 (23.3)  | 0.93 | [0.7 ; 1.25]  | 0.65     | 19 (31.1) | 8 (34.8)  | 1.19 | [0.51 ; 2.78] | 0.69     | 77 (24.6)  | 46 (22)    | 0.90 | [0.66 ; 1.23] | 0.51     |
| PaO <sub>2</sub> /FiO <sub>2</sub> < 150     | 255 (68.2) | 182 (78.4) | 1.46 | [1.07 ; 1.98] | 0.02     | 34 (55.7) | 15 (65.2) | 1.04 | [0.43 ; 2.5]  | 0.93     | 221 (70.6) | 167 (79.9) | 1.47 | [1.05 ; 2.04] | 0.02     |
| Invasive mechanical ventilation              | 252 (67.4) | 152 (65.5) | 0.92 | [0.7 ; 1.21]  | 0.55     | 56 (91.8) | 19 (82.6) | 1.03 | [0.28 ; 3.8]  | 0.97     | 196 (62.6) | 133 (63.6) | 0.98 | [0.73 ; 1.3]  | 0.88     |
| Vasopressors                                 | 145 (38.8) | 81 (34.9)  | 0.87 | [0.65 ; 1.17] | 0.35     | 12 (19.7) | 5 (21.7)  | 1.01 | [0.39 ; 2.59] | 0.99     | 133 (42.5) | 76 (36.4)  | 0.84 | [0.62 ; 1.15] | 0.28     |
| Renal replacement therapy                    | 34 (9.1)   | 4 (1.7)    | 0.21 | [0.08 ; 0.55] | <0.01    | 7 (11.5)  | 0 (0)     |      |               |          | 27 (8.6)   | 4 (1.9)    | 0.24 | [0.09 ; 0.63] | <0.01    |
| Corticoids                                   | 168 (44.9) | 128 (55.2) | 1.46 | [1.11 ; 1.92] | 0.01     | 19 (31.1) | 7 (30.4)  | 0.90 | [0.4 ; 2.03]  | 0.81     | 149 (47.6) | 121 (57.9) | 1.50 | [1.12 ; 2.01] | 0.01     |
| Antibiotics at admission                     | 274 (73.3) | 161 (69.4) | 0.64 | [0.48 ; 0.86] | <0.01    | 32 (52.5) | 17 (73.9) | 1.85 | [0.68 ; 5.07] | 0.23     | 242 (77.3) | 144 (68.9) | 0.56 | [0.41 ; 0.76] | <0.01    |
| Beta-lactamase inhibitor                     | 63 (16.8)  | 37 (15.9)  | 0.88 | [0.63 ; 1.24] | 0.48     | 18 (29.5) | 11 (47.8) | 1.65 | [0.74 ; 3.68] | 0.22     | 45 (14.4)  | 26 (12.4)  | 0.77 | [0.52 ; 1.14] | 0.19     |
| Cephalosporin                                | 204 (54.5) | 128 (55.2) | 0.89 | [0.69 ; 1.16] | 0.40     | 22 (36.1) | 9 (39.1)  | 1.08 | [0.44 ; 2.67] | 0.87     | 182 (58.1) | 119 (56.9) | 0.87 | [0.66 ; 1.14] | 0.31     |
| Macrolides                                   | 127 (34)   | 85 (36.8)  | 0.99 | [0.76 ; 1.29] | 0.94     | 21 (34.4) | 7 (30.4)  | 0.74 | [0.29 ; 1.87] | 0.52     | 106 (33.9) | 78 (37.5)  | 1.03 | [0.78 ; 1.35] | 0.85     |
| Aminosides                                   | 41 (11)    | 13 (5.6)   | 0.53 | [0.31 ; 0.92] | 0.02     | 8 (13.1)  | 2 (8.7)   | 0.70 | [0.19 ; 2.55] | 0.59     | 33 (10.5)  | 11 (5.3)   | 0.50 | [0.28 ; 0.9]  | 0.02     |
| Fluoroquinolone                              | 27 (7.2)   | 11 (4.8)   | 0.61 | [0.34 ; 1.1]  | 0.10     | 4 (6.6)   | 2 (8.7)   | 1.33 | [0.31 ; 5.78] | 0.70     | 23 (7.3)   | 9 (4.3)    | 0.59 | [0.31 ; 1.12] | 0.11     |
| Anti MSSA                                    | 8 (2.1)    | 0 (0)      |      |               |          | 3 (4.9)   | 0 (0)     |      |               |          | 5 (1.6)    | 0 (0)      |      |               |          |
| Anti MRSA                                    | 17 (4.5)   | 4 (1.7)    | 0.47 | [0.18 ; 1.25] | 0.13     | 6 (9.8)   | 1 (4.3)   | 0.56 | [0.07 ; 4.4]  | 0.58     | 11 (3.5)   | 3 (1.4)    | 0.49 | [0.16 ; 1.46] | 0.20     |
| MDR colonisation                             | 19 (5.1)   | 20 (8.7)   | 1.48 | [0.92 ; 2.37] | 0.11     | 3 (4.9)   | 4 (17.4)  | 3.16 | [1.25 ; 7.98] | 0.01     | 16 (5.1)   | 16 (7.7)   | 1.35 | [0.79 ; 2.3]  | 0.27     |
| Bacteraemia                                  | 16 (4.3)   | 9 (3.9)    | 0.98 | [0.49 ; 1.94] | 0.95     | 5 (8.2)   | 0 (0)     |      |               |          | 11 (3.5)   | 9 (4.3)    | 1.25 | [0.63 ; 2.49] | 0.53     |
| Co-infection at admission                    | 56 (15)    | 31 (13.4)  | 0.83 | [0.57 ; 1.2]  | 0.32     | 18 (29.5) | 9 (39.1)  | 0.96 | [0.36 ; 2.56] | 0.94     | 38 (12.1)  | 22 (10.5)  | 0.76 | [0.49 ; 1.18] | 0.22     |

VAP: Ventilator Associated Pneumonia; BMI: Body Mass Index; SOFA: Sequential organ failure assessment, SAPS: simplified acute physiology score; MSSA: methicillin-susceptible *Staphylococcus aureus*, MRSA: methicillin-resistant *Staphylococcus aureus*; MDR: multi drug resistant

*Table S5: Impact of co-infection on the risk of subsequent VAP among the patients at risk of VAP – multivariate survival analysis*

| <b>Cohort</b>      | <b>Comparisons</b>                     | <b>SubHR</b> | <b>SubHR 95% CI</b> | <b>p</b> |
|--------------------|----------------------------------------|--------------|---------------------|----------|
| <b>All cohort*</b> | RespCoBact vs no RespCoBact            | 0.82         | [0.57; 1.18]        | 0.30     |
|                    | SARS-CoV2 vs Influenza                 | 1.08         | [0.66; 1.75]        | 0.76     |
| <b>All Cohort*</b> | Influenza: RespCoBact vs no RespCoBact | 1.11         | [0.46; 2.66]        | 0.82     |
|                    | SARS-CoV2: RespCoBact vs no RespCoBact | 0.86         | [0.52; 1.4]         | 0.54     |
|                    | No RespCoBact: SARS-CoV2 vs Influenza  | 1.19         | [0.67; 2.13]        | 0.55     |
|                    | RespCoBact: SARS-CoV2 vs Influenza     | 0.93         | [0.41; 2.07]        | 0.85     |
| <b>Influenza**</b> | RespCoBact vs no RespCoBact            | 0.78         | [0.28 ; 2.14]       | 0.62     |
| <b>SARS-CoV2*</b>  | RespCoBact vs no RespCoBact            | 0.75         | [0.49 ; 1.13]       | 0.17     |

\*adjustment for chronic kidney disease, acute respiratory failure on admission, antimicrobial therapy on admission, steroids on admission

\*\*adjustment for MDR colonisation.

VAP: Ventilator Associated Pneumonia; RespCoBact: Respiratory Bcterial Co-Infection on admission

Table S6: Risk factors for co-infection, univariate analysis, logistic regression.

|                                                        | Influenza             |                   |      |               |      | SARS-CoV2              |                   |      |               |       |
|--------------------------------------------------------|-----------------------|-------------------|------|---------------|------|------------------------|-------------------|------|---------------|-------|
|                                                        | No ResCoBact<br>N=118 | ResCoBact<br>N=39 | OR   | ORCI          | p    | No ResCoBact<br>N=1094 | ResCoBact<br>N=98 | OR   | ORCI          | p     |
| <b>Time from hospital admission to ICU &gt; 2 days</b> | 32 (27.1)             | 6 (15.4)          | 0.49 | [0.19 ; 1.28] | 0.14 | 447 (40.9)             | 41 (41.8)         | 1.04 | [0.68 ; 1.58] | 0.85  |
| <b>Age &gt; 60 years</b>                               | 58 (49.2)             | 21 (53.8)         | 1.21 | [0.58 ; 2.49] | 0.61 | 683 (62.4)             | 61 (62.2)         | 0.99 | [0.65 ; 1.52] | 0.97  |
| <b>Sex (male)</b>                                      | 71 (60.2)             | 22 (56.4)         | 0.86 | [0.41 ; 1.78] | 0.68 | 790 (72.2)             | 74 (75.5)         | 1.19 | [0.73 ; 1.92] | 0.48  |
| <b>BMI &gt; 30 kg/m<sup>2</sup></b>                    | 40 (33.9)             | 5 (12.8)          | 0.29 | [0.1 ; 0.79]  | 0.02 | 425 (38.8)             | 38 (38.8)         | 1.00 | [0.65 ; 1.52] | 0.99  |
| <b>Chronic cardiovascular disease</b>                  | 20 (16.9)             | 2 (5.1)           | 0.26 | [0.06 ; 1.19] | 0.08 | 275 (25.1)             | 31 (31.6)         | 1.38 | [0.88 ; 2.16] | 0.16  |
| <b>Chronic lung disease</b>                            | 37 (31.4)             | 12 (30.8)         | 0.97 | [0.44 ; 2.13] | 0.95 | 123 (11.2)             | 10 (10.2)         | 0.90 | [0.45 ; 1.77] | 0.75  |
| <b>Chronic kidney disease</b>                          | 16 (13.6)             | 2 (5.1)           | 0.34 | [0.08 ; 1.57] | 0.17 | 98 (9)                 | 10 (10.2)         | 1.15 | [0.58 ; 2.29] | 0.68  |
| <b>Immunodepression</b>                                | 51 (43.2)             | 8 (20.5)          | 0.34 | [0.14 ; 0.8]  | 0.01 | 132 (12.1)             | 14 (14.3)         | 1.21 | [0.67 ; 2.2]  | 0.52  |
| <b>Chronic liver disease</b>                           | 6 (5.1)               | 1 (2.6)           | 0.49 | [0.06 ; 4.21] | 0.52 | 20 (1.8)               | 6 (6.1)           | 3.50 | [1.37 ; 8.94] | <0.01 |
| <b>Diabetes</b>                                        | 21 (17.8)             | 5 (12.8)          | 0.68 | [0.24 ; 1.94] | 0.47 | 165 (15.1)             | 19 (19.4)         | 1.35 | [0.8 ; 2.3]   | 0.26  |

BMI: Body Mass Index; ResCoBact: Respiratory bacterial co infection on admission
